# Supplementary material for: High self-reactivity drives T-bet and potentiates Treg function in tissue-specific autoimmunity
Source: JCI journal article supplement (doi:10.1172/jci.insight.97322), 2018-01-24
Supplement: sd1 [file 1]

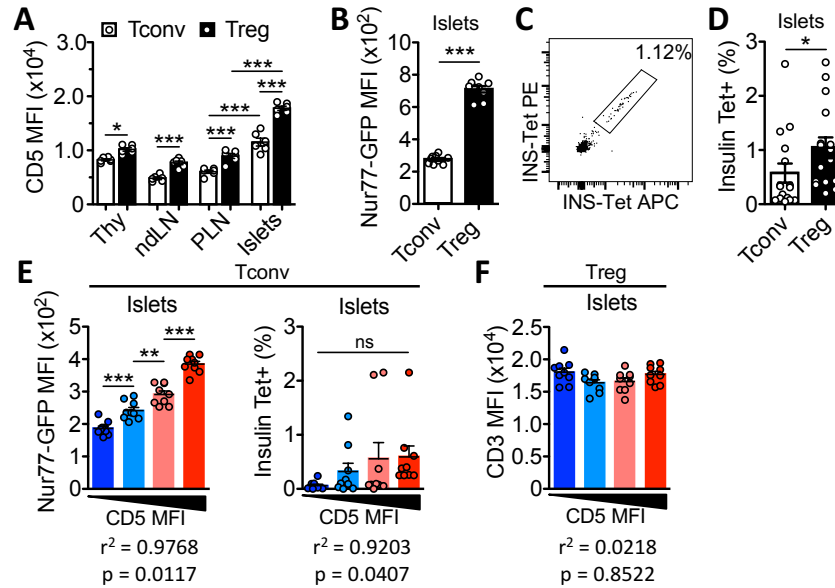

**Supplemental Figure 1. CD5 correlates with self-reactivity, Related to Figure 1.** (A) Analysis of 10-18 week old NOD female mice. CD5 expression on Tconv (CD4+CD3+Foxp3<sup>-</sup>) and Tregs (CD4+CD3+Foxp3<sup>+</sup>) in the thymus (Thy), non-draining lymph nodes (ndLN), pancreatic LN (PLN), and pancreatic islets (Islets). An average of 6 mice from two experiments is shown. (B-F) Analysis of 7-12 week old NOD.Nur77<sup>GFP</sup> female mice. (B) GFP reporter of Nur77 expression in Tconv (CD4+CD3+Foxp3<sup>-</sup>) compared to Tregs (CD4+CD3+Foxp3<sup>+</sup>) in the islets. An average of 9 mice from one experiment is shown. (C) Representative flow plot of InsB:9-23 tetramer positive cells; analysis is gated on CD4+CD3+Foxp3<sup>+</sup> cells. (D) Frequency of tetramer+ T cells in Tconv (Foxp3<sup>-</sup>) and Treg (Foxp3<sup>+</sup>) CD4+ T cells. An average of 16 mice from two experiments is shown. (E) Correlation between CD5 expression and GFP reporter of Nur77 expression or InsB:9-23 tetramer staining of islet-infiltrating Tconv. An average of 9 mice from one experiment is shown. (F) Level of CD3 expression on islet-infiltrating Tregs (CD4+CD3+Foxp3<sup>+</sup>) among the four CD5 quartiles shown in Figure 1A. Significance was determined by one-way analysis of variance (ANOVA) with Bonferroni's multiple-comparisons test (A, E, F), Pearson correlation (E, F) and Mann-Whitney U-test (B, D). The mean  $\pm$  SEM is shown. ns, not significant ( $p > 0.05$ ), \* $p < 0.05$ , \*\* $p < 0.005$ , \*\*\* $p < 0.0005$ .

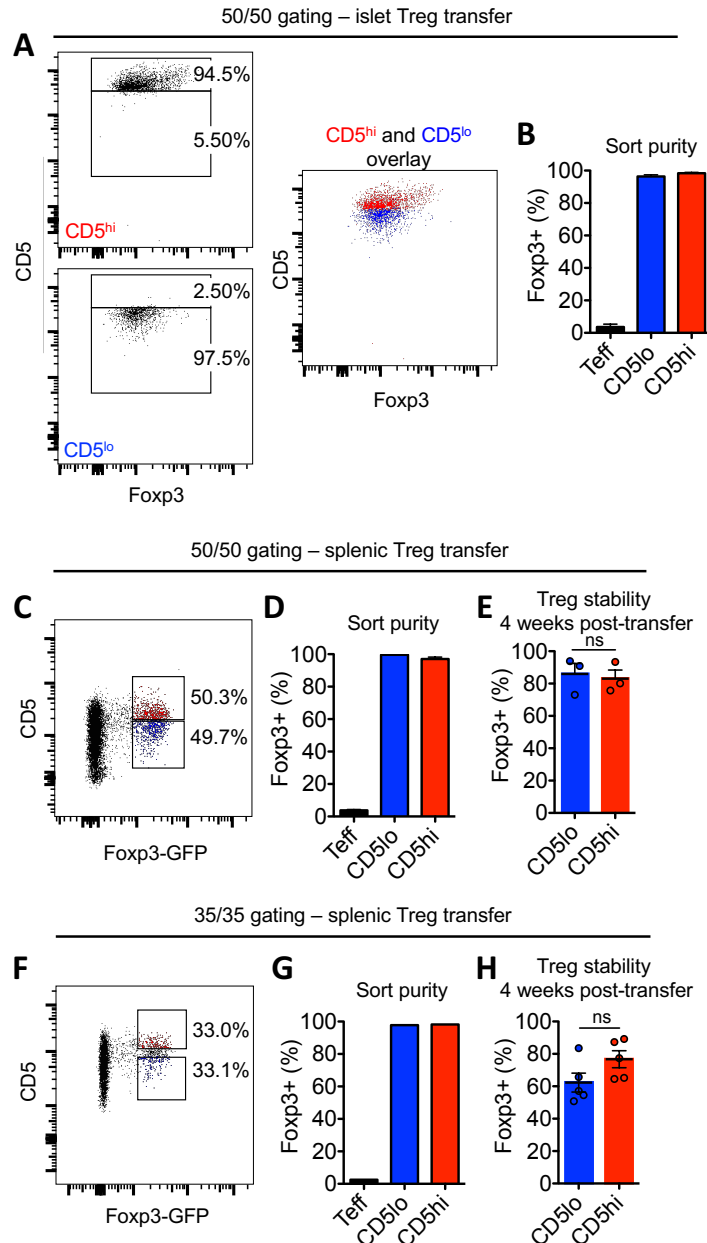

**Supplemental Figure 2. Post-sort analysis of Tregs sorted from the infiltrated islets and spleen, Related to Figures 1 and 2.** (A) Representative gating strategy of islet CD5<sup>hi</sup> and CD5<sup>lo</sup> Tregs post-sort. (B) Purity of CD5<sup>hi</sup> and CD5<sup>lo</sup> Tregs post-sort based on expression of Foxp3 (Gated on: CD4+CD3+Foxp3+). Data are pooled from three independent experiments. (C) Sort gating for 50/50 CD5<sup>hi</sup> and CD5<sup>lo</sup> splenic Treg transfers. (D) Purity of Tconv (Foxp3<sup>-</sup>) and Tregs (Foxp3<sup>+</sup>) post-sort. Data are pooled from two independent experiments. (E) Congenically marked splenic Naive (Foxp3<sup>GFP</sup>-CD45RB<sup>hi</sup>CD45.2+) and Tregs (Foxp3<sup>GFP</sup>+CD45.1+) were transferred to NOD.scid recipients. Stability of Foxp3<sup>+</sup> population in the spleen was assessed 4-weeks post transfer based on intracellular Foxp3 staining after gating on CD45.1 positive T cells. (F) Sort gating strategy for 35/35 CD5<sup>hi</sup> and CD5<sup>lo</sup> splenic Treg transfers. (G) Purity of Tconv (Foxp3<sup>-</sup>) and Tregs (Foxp3<sup>+</sup>) post-sort. Data are from one representative experiment. The mean  $\pm$  SEM is shown. (H) Congenically marked splenic Naive (Foxp3<sup>GFP</sup>-CD45RB<sup>hi</sup>CD45.2+) and Tregs (Foxp3<sup>GFP</sup>+CD45.1+) were transferred to NOD.scid recipients. Stability of Foxp3<sup>+</sup> population in the spleen was assessed 4-weeks post transfer based on intracellular Foxp3 staining after gating on CD45.1 positive T cells. Significance was determined by Mann-Whitney *U*-test (E, H).

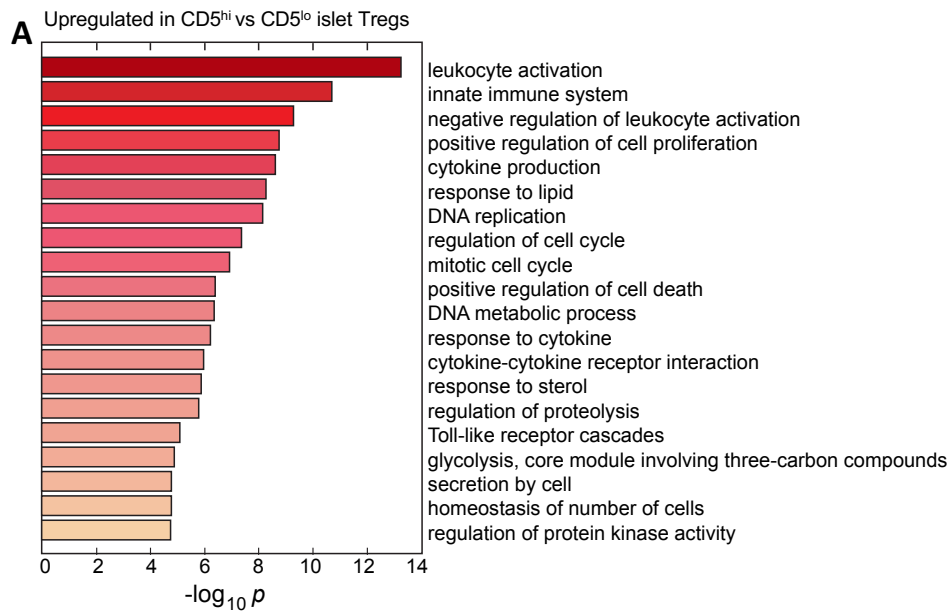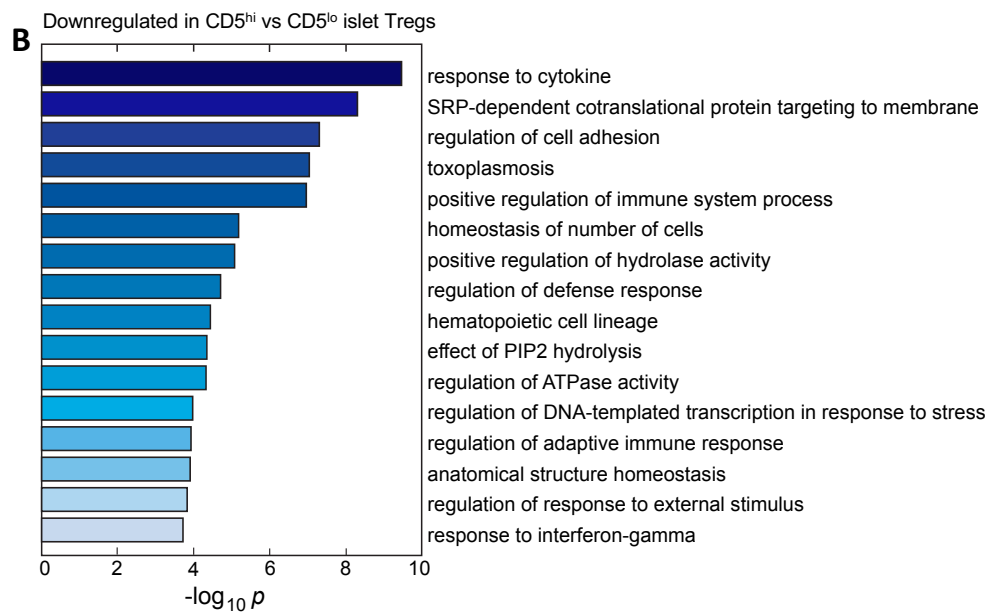

**Supplemental Figure 3. Transcriptional landscape of CD5<sup>hi</sup> and CD5<sup>lo</sup> Tregs, Related to Figure 3. (A)** Pathways upregulated in CD5<sup>hi</sup> over CD5<sup>lo</sup> islet Tregs. **(B)** Pathways down regulated in CD5<sup>hi</sup> over CD5<sup>lo</sup> islet Tregs.

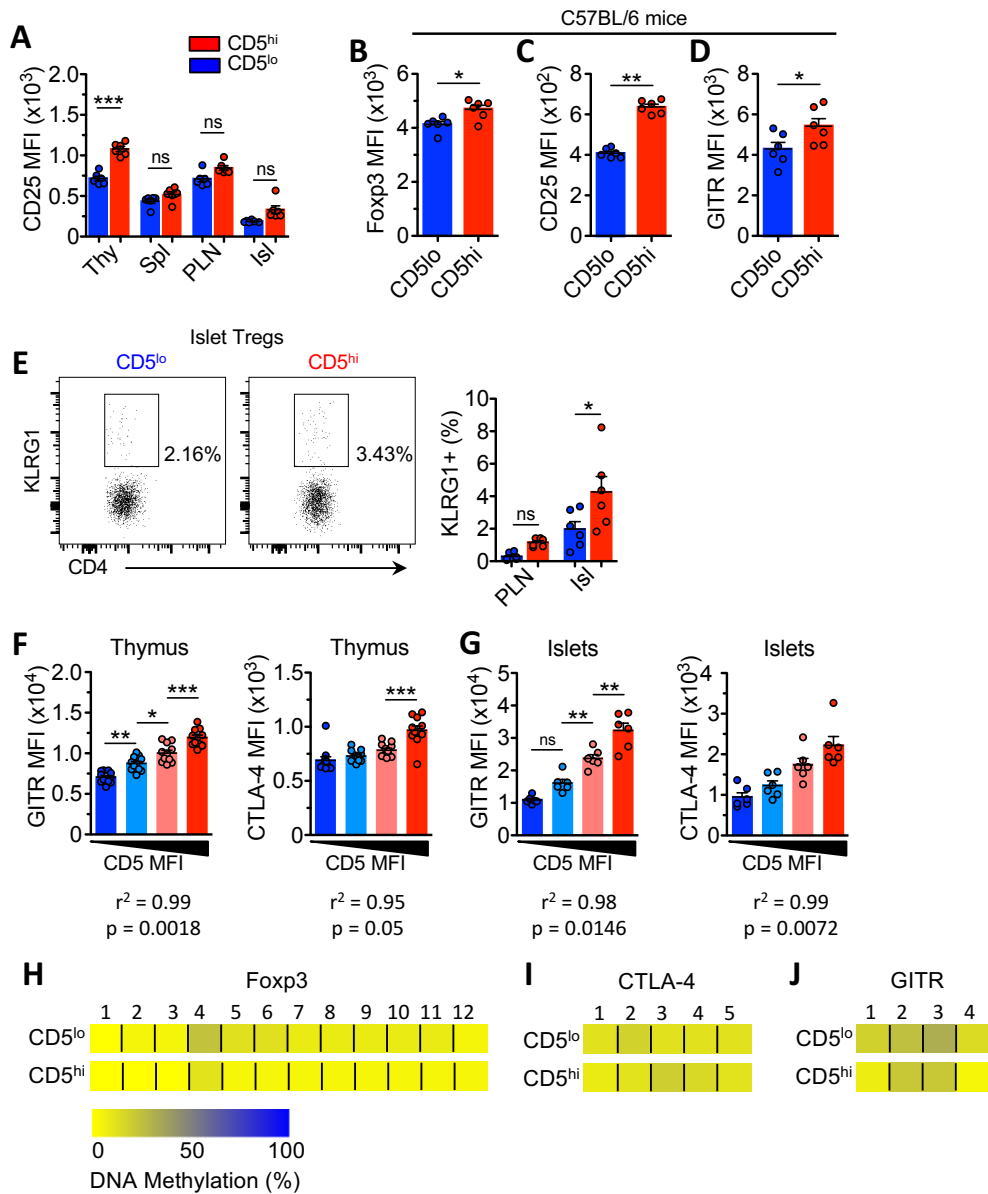

**Supplemental Figure 4. Analysis of the Treg functional phenotype, Related to Figure 4.** (A) Quantification of CD25 expressed by CD5<sup>hi</sup> or CD5<sup>lo</sup> Tregs from the thymus (thy), spleen (Spl), pancreatic LN (PLN), and islets of 10-18wk old female NOD mice. Gating strategy in Figure 4A. An average of 6 mice from two experiments is shown. (B-D) Analysis of Tregs from spleens of C57BL/6 mice. (B) Foxp3, (C) CD25, and (D) GITR expression by CD4+CD3+Foxp3+ Tregs. An average of 6 mice from one experiment is shown. (E) Representative flow plots and combined analysis of KLRG1 expression on Tregs in PLN and islets of 10-18wk old NOD mice. An average of 6 mice from 2 experiments is shown. (F) Correlation between GITR, CTLA-4 and CD5 in the thymus. An average of 11 mice from three experiments is shown. (G) Correlation between GITR, CTLA-4 and CD5 in the islets. An average of 6 mice from two experiments is shown. (H-J) Bisulfite sequencing analysis of DNA isolated from CD5<sup>hi</sup> and CD5<sup>lo</sup> splenic Tregs sorted from five male NOD mice. (H) *Foxp3* intron 1 (I) *Ctla4* exon 2 and (J) *Tnfrsf18* exon 5. Significance was determined by one-way analysis of variance (ANOVA) with Bonferroni's multiple-comparisons test (A, E, F, G), Mann-Whitney *U*-test (B-D) and Pearson correlation (F, G). The mean  $\pm$  SEM is shown. ns, not significant ( $p > 0.05$ ), \* $p < 0.05$ , \*\* $p < 0.005$ , \*\*\* $p < 0.0005$ .
